# Supplementary material for: Topochemical and phase transformation induced Co9S8/NC nanosheets for high-performance sodium-ion batteries
Source: Royal Society of Chemistry journal article supplement (doi:10.1039/d3dt02449k), 2023-01-01
Supplement: d3dt02449k1.pdf [file d3dt02449k1.pdf]

Supporting information

## Topochemical and phase transformation induced $\text{Co}_9\text{S}_8/\text{NC}$ nanosheets for high-performance sodium-ion battery

Yining Li, Shimei Wu, Chilin Liu, Zhiting Liu, Wei Yang, Yufei Zhang\* and Haosen Fan\*

### Experimental section

#### Chemicals and materials

Cobaltous nitrate hexahydrate (99%), 2-methylimidazole(99.5%), thiourea and methyl alcohol were purchased from Macklin (Shanghai, China). Polyvinylidene fluoride (99%) was purchased from Yuanye (Shanghai, China). Acetylene black (99.5%) was purchased from Yilongsheng (Suzhou, China). All chemicals were directly used without further treatments.

#### Synthetic methods

Slightly improved on the traditional method, 0.582g  $\text{CO}(\text{NO}_3)_2 \cdot 6\text{H}_2\text{O}$  (1mmol) was dissolved in 20ml methanol solution, and 0.328g 2-methylimidazole (2mmol) was dissolved in 20ml methanol solution. After being completely dissolved by ultrasound for 5 minutes, the methanol solution of  $\text{CO}(\text{NO}_3)_2 \cdot 6\text{H}_2\text{O}$  was quickly added into the methanol solution of 2-methylimidazole while stirring. After the solution was aged for 24 hours, a methanol solution containing ZIF-67 was obtained. The ZIF-67 was rinsed with methanol, and the precipitation collected by centrifugation was dried overnight under a vacuum at 60°C. The prepared ZIF-67 (2mmol) was added to 20 ml of completely dissolved deionized water containing thiourea (4mmol). After ultrasonic dissolution, the solution was transferred to a polytetrafluoroethylene-lined autoclave and heat treated at 160°C for 12h. It was cleaned with deionized water, collected by centrifugation and dried overnight under vacuum at 60°C to obtain ZIF-67S. ZIF-67S was annealed in a tube furnace under nitrogen atmosphere, heated to 400°C, held for 2 hours at a heating rate of 5°C/min, and the final product  $\text{Co}_9\text{S}_8/\text{NC}$  was obtained. For comparison, ZIF-67 was directly annealed and vulcanized to obtain the final product  $\text{CoS}_2/\text{NC}$ .

#### Material characterization

The crystal structure of materials was analyzed by X-ray diffraction (XRD, PANalytical PW3040/60 X-ray powder diffractometer equipped with Cu-K $\alpha$  radiation). The scanning electron microscopy (SEM, JSM-7001F high-resolution microscope) and transmission electron microscopy (TEM, JEOL JEM2100F microscope) were recorded to characterize the micro-morphology of the synthesized products. The elemental composition and molecular structure were determined by X-ray photoelectron spectroscopy (XPS, Al-K $\alpha$ ).

#### Electrochemical measurements

All the electrochemical performances were evaluated in 2032-type coin cells assembled from the materials as the anode. The working electrodes were made of 70 wt% active material, 20 wt% acetylene

black, and 10 wt% polyvinylidene fluoride, respectively. Thereafter, added N-Methyl-2-pyrrolidinone (NMP) to the above mixture and ground thoroughly to the slurry. Then the slurries were coating on copper foil and dry overnight in vacuum oven at 60°C. Then the coin cells were assembled under the argon-filled ultra-pure glove box with using sodium coil, Whatman glass fiber GF/D, and 1.0M NaPF<sub>6</sub> as anode, separator, and electrolyte, respectively. Galvanostatic charge-discharge tests were measured on the NEWARE battery tester at 0.01-2.8V. Cyclic voltammetry (CV) test window voltage ranged from 0.01-2.8V at the scan rate of 0.1mV s<sup>-1</sup>. The electrochemical impedance spectroscopy (EIS) was tested with frequency range from 0.01Hz to 100KHz.

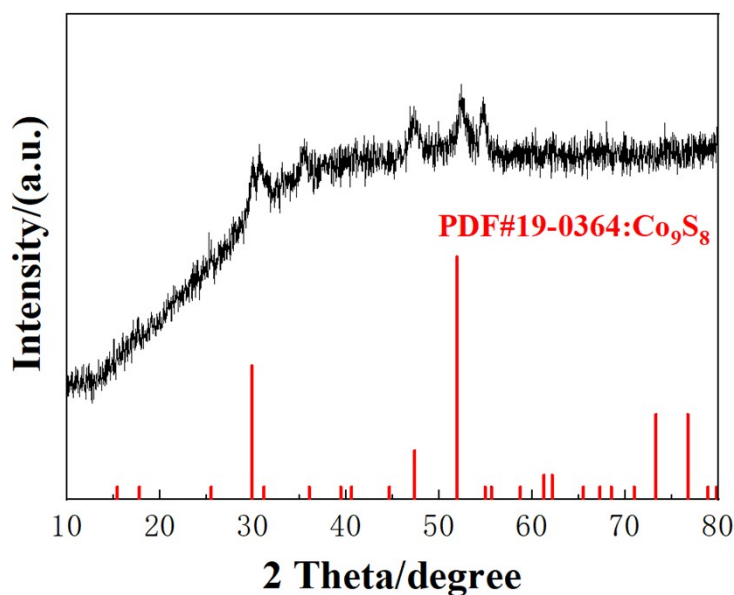

Fig.S1. XRD of ZIF-67s.

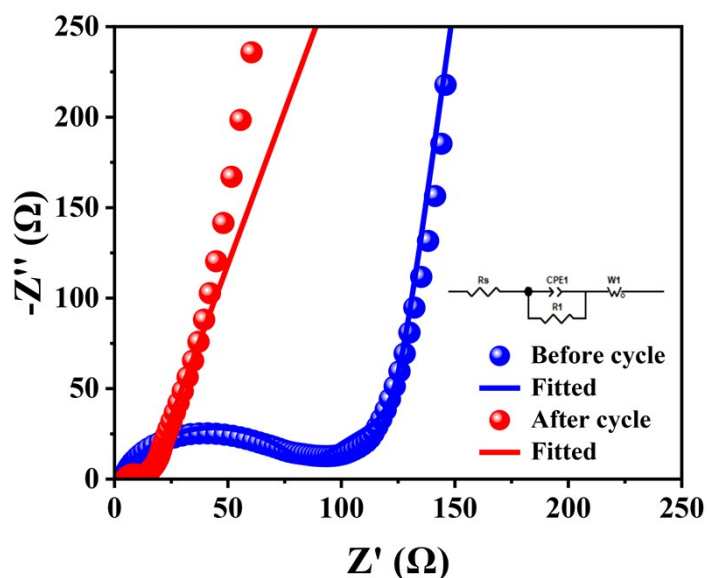

Fig.S2. Nyquist plots and related equivalent circuits of Co<sub>9</sub>S<sub>8</sub>/NC in SIBs.

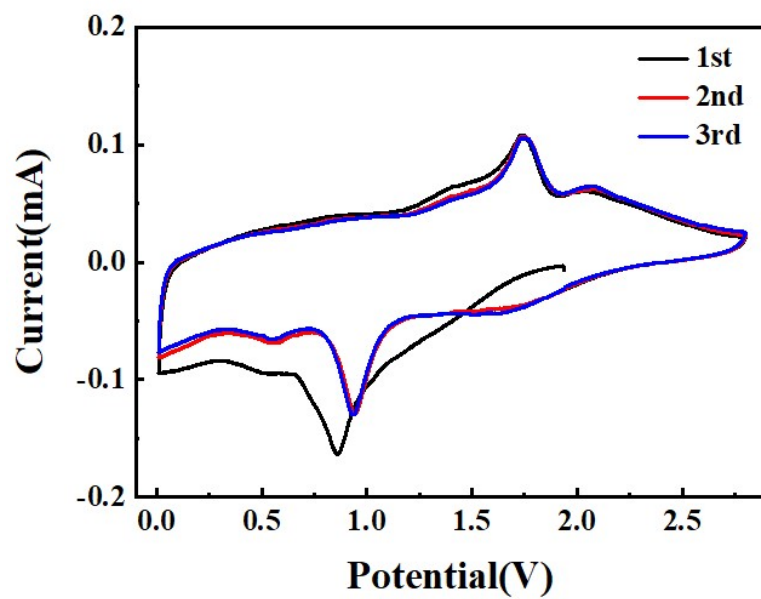

Fig.S3. CV of CoS<sub>2</sub>/NC at 0.1mV s<sup>-1</sup>.
